# Supplementary material for: Speciation of indium(iii) chloro complexes in the solvent extraction process from chloride aqueous solutions to ionic liquids
Source: Royal Society of Chemistry journal article supplement (doi:10.1039/c7dt00618g), 2017-01-01
Supplement: c7dt00618g1.pdf [file c7dt00618g1.pdf]

## Electronic Supplementary Information

### **Speciation of indium(III) chloro complexes in the solvent extraction process from chloride aqueous solutions to ionic liquids**

**Clio Deferm, Bieke Onghena, Tom Vander Hoogerstraete, Dipanjan Banerjee, Jan Luyten, Harald Oosterhof, Jan Fransaer and Koen Binnemans\***

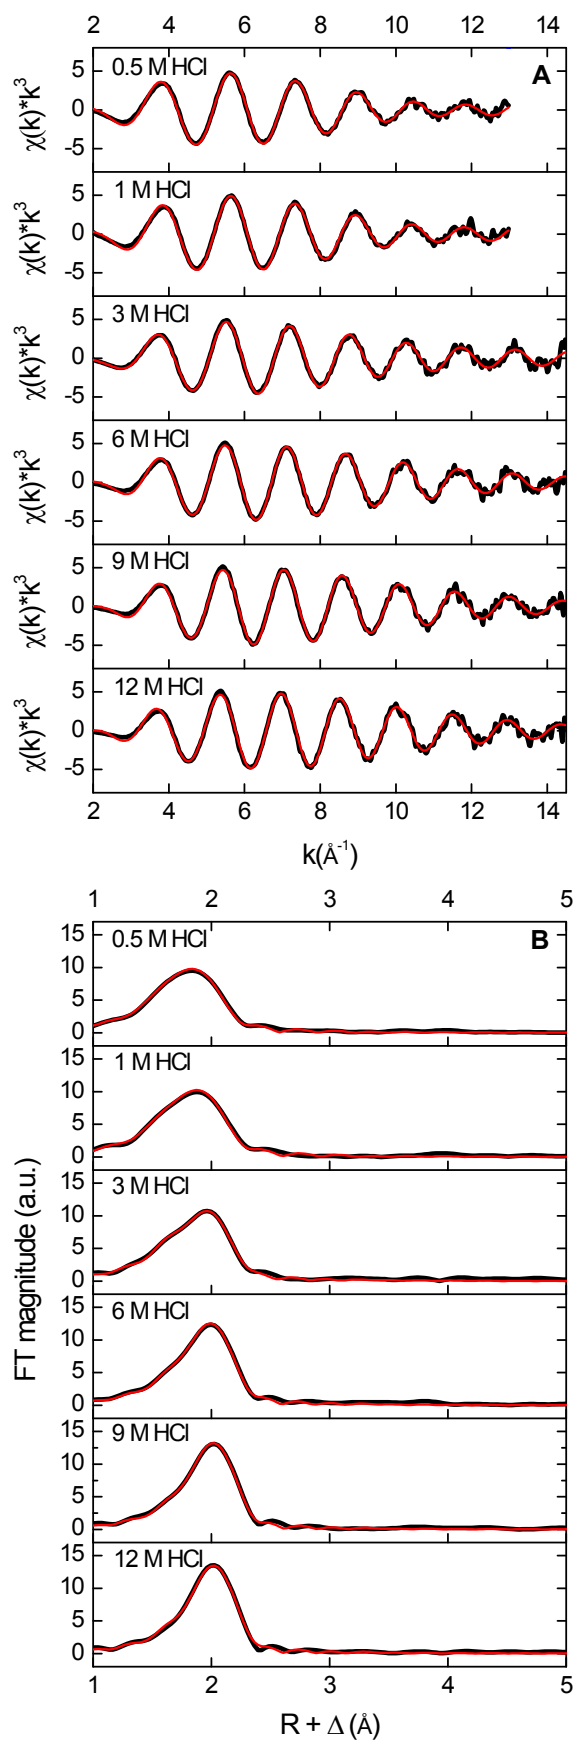

**Fig. S1** Indium K-edge  $k^2$ -weighted EXAFS spectra (A) and the corresponding FTs (B) for the indium(III) complexes in aqueous solutions as a function of the HCl concentration ( $5 \text{ g L}^{-1}$  indium). Experimental data (black) and theoretical fit (red) are shown.

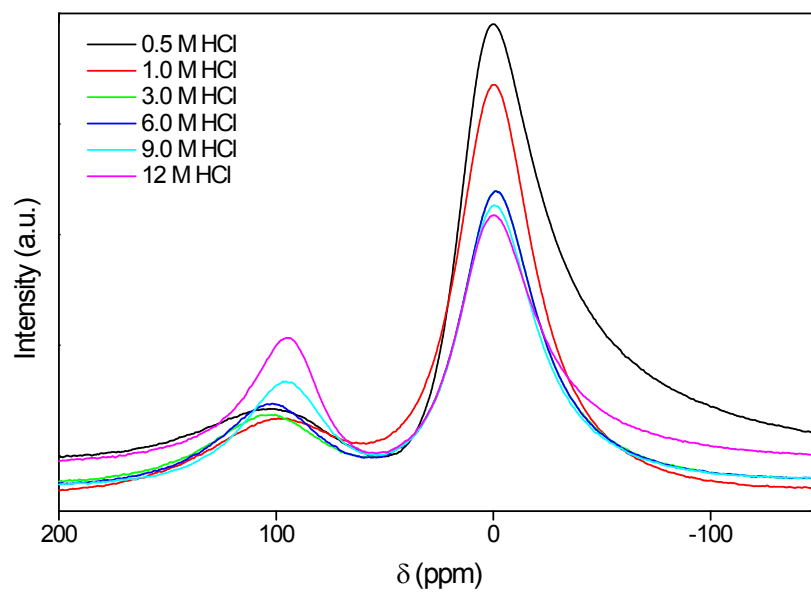

**Fig. S2**  $^{115}\text{In}$  NMR spectra of the aqueous phase before extraction at 60 °C containing 5 g L<sup>-1</sup> indium(III) and varying HCl concentration: 0.5 M (—), 1 M (—), 3 M (—), 6 M (—), 9 M (—) and 12 M (—).

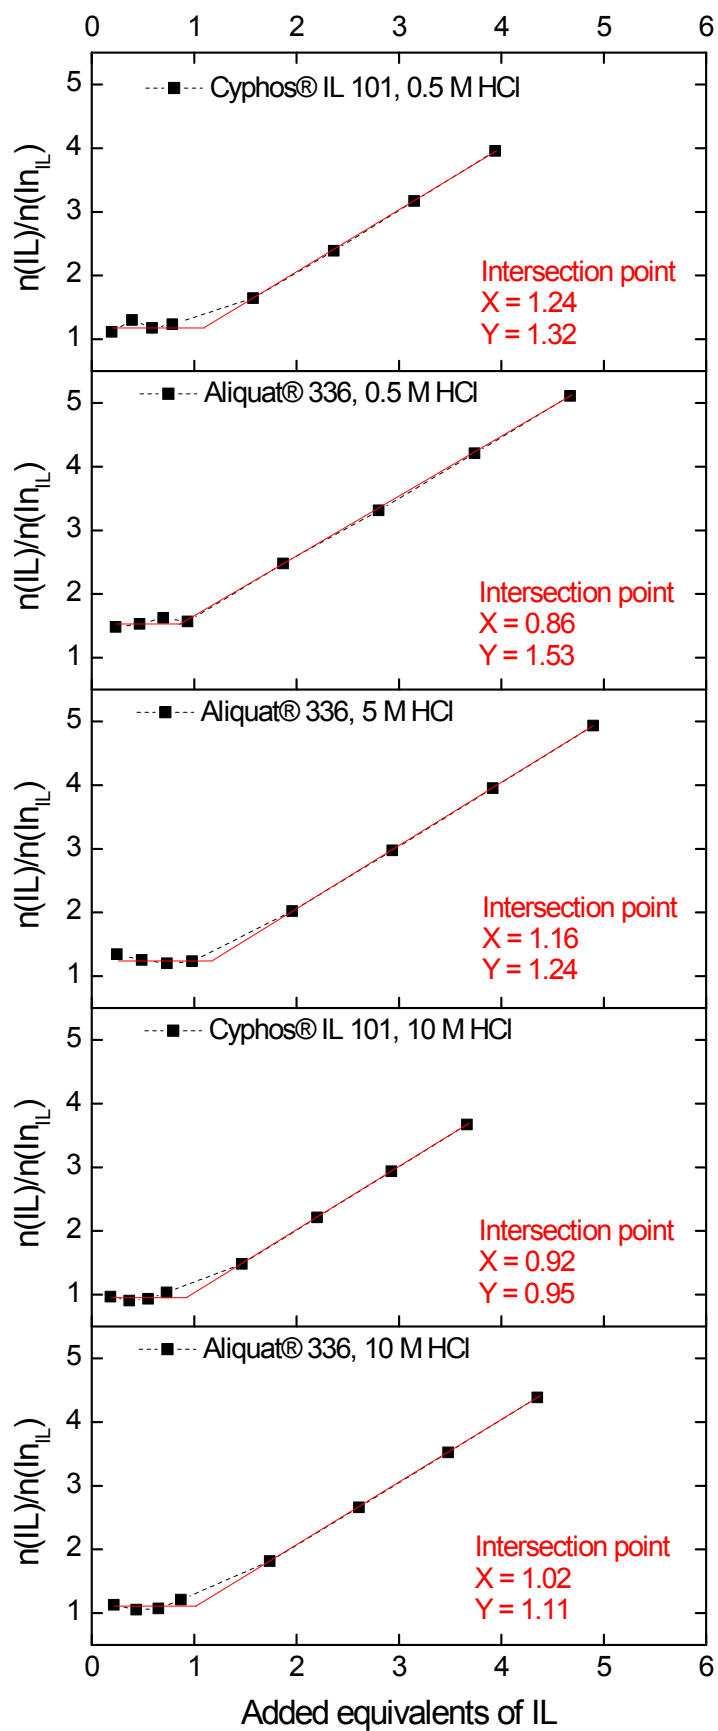

**Fig. S3** Number of moles of ionic liquid over the number of moles of extracted indium ( $n(\text{IL})/n(\text{In}_{\text{IL}})$ ) as a function of the number of ionic liquid equivalents added, at constant initial metal concentrations of indium and 60 °C. Aqueous phase: initial indium(III) concentration of 50 g L<sup>-1</sup>.

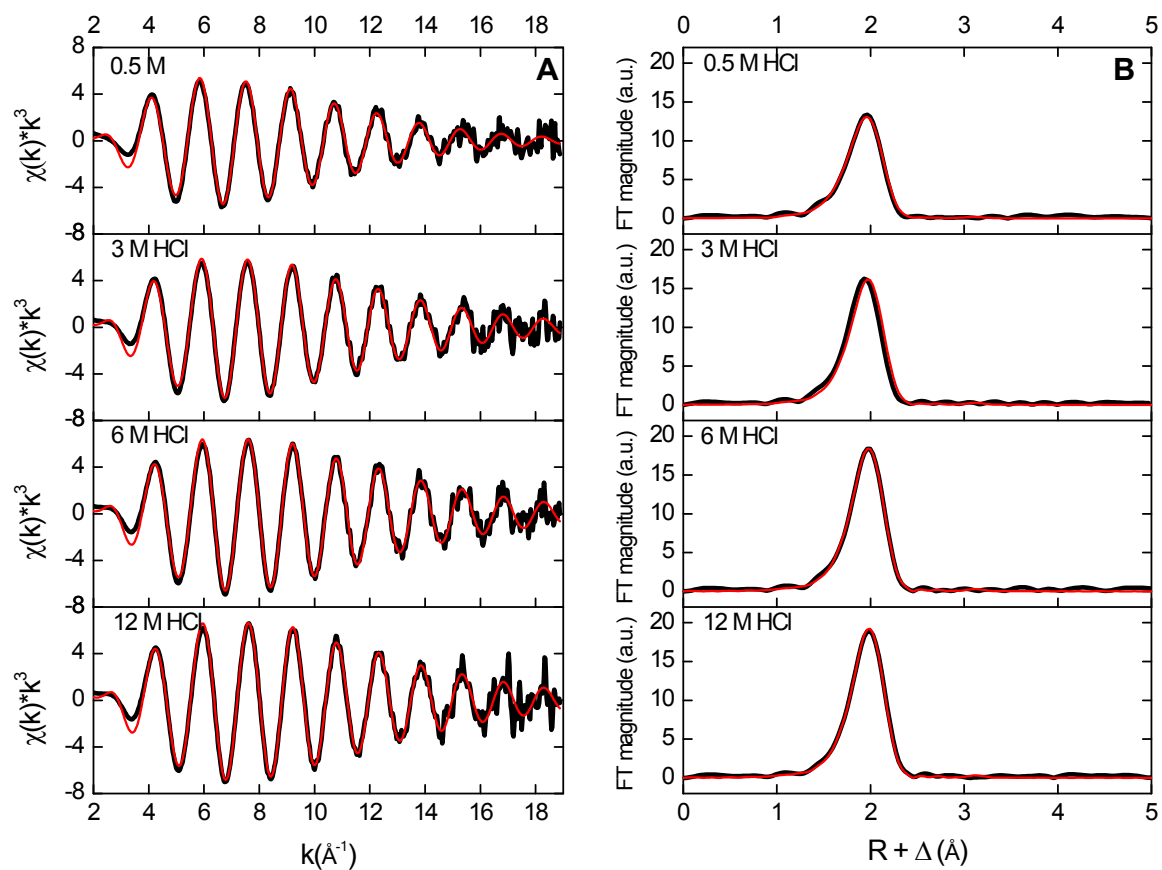

**Fig. S4** Indium K-edge  $k^3$ -weighted EXAFS spectra (A) and the corresponding FTs (B) for the indium(III) complexes in Aliquat<sup>®</sup> 336 as a function of the HCl concentration. IL phase obtained after extraction containing 5 g L<sup>-1</sup> indium. Experimental data (black) and theoretical fit (red) are shown.

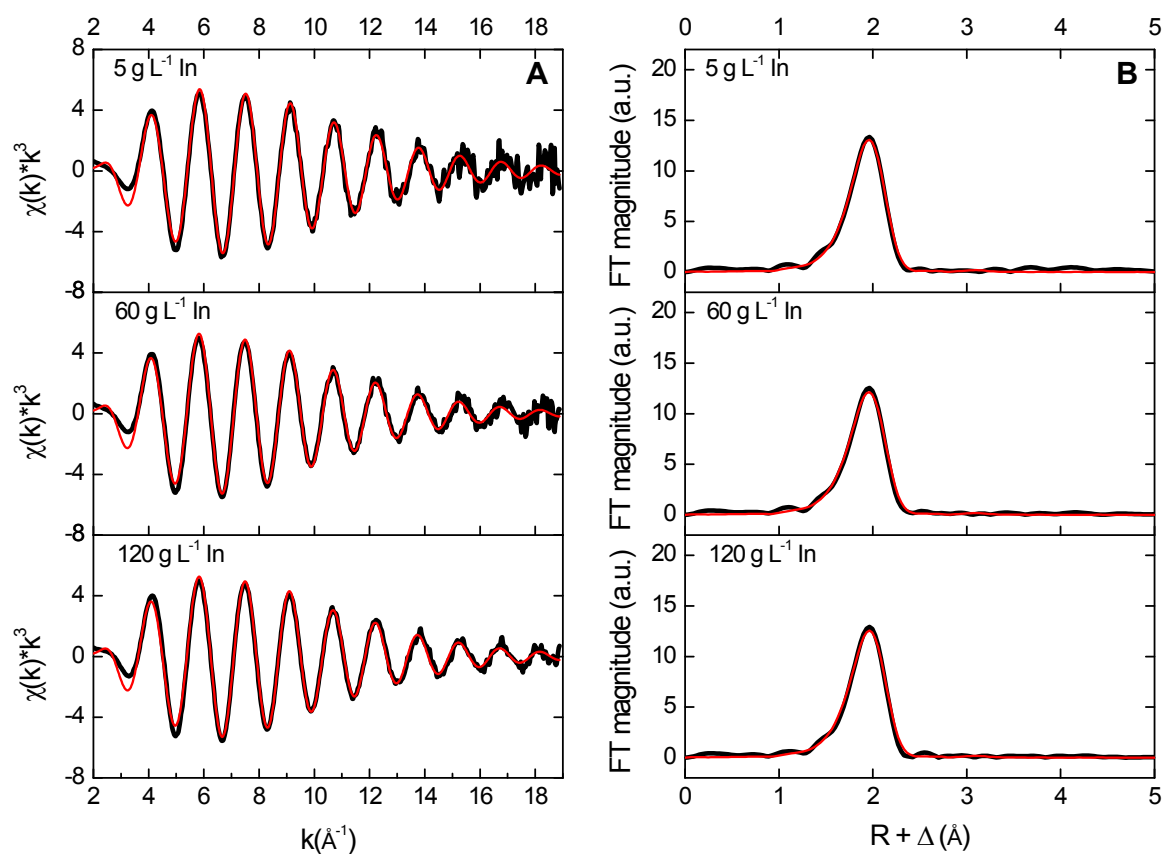

**Fig. S5** Indium K-edge  $k^3$ -weighted EXAFS spectra (A) and the corresponding FTs (B) for the indium(III) complexes in Aliquat<sup>®</sup> 336 as a function of the indium concentration. IL phase obtained after extraction containing 0.5 M HCl. Experimental data (black) and theoretical fit (red) are shown.

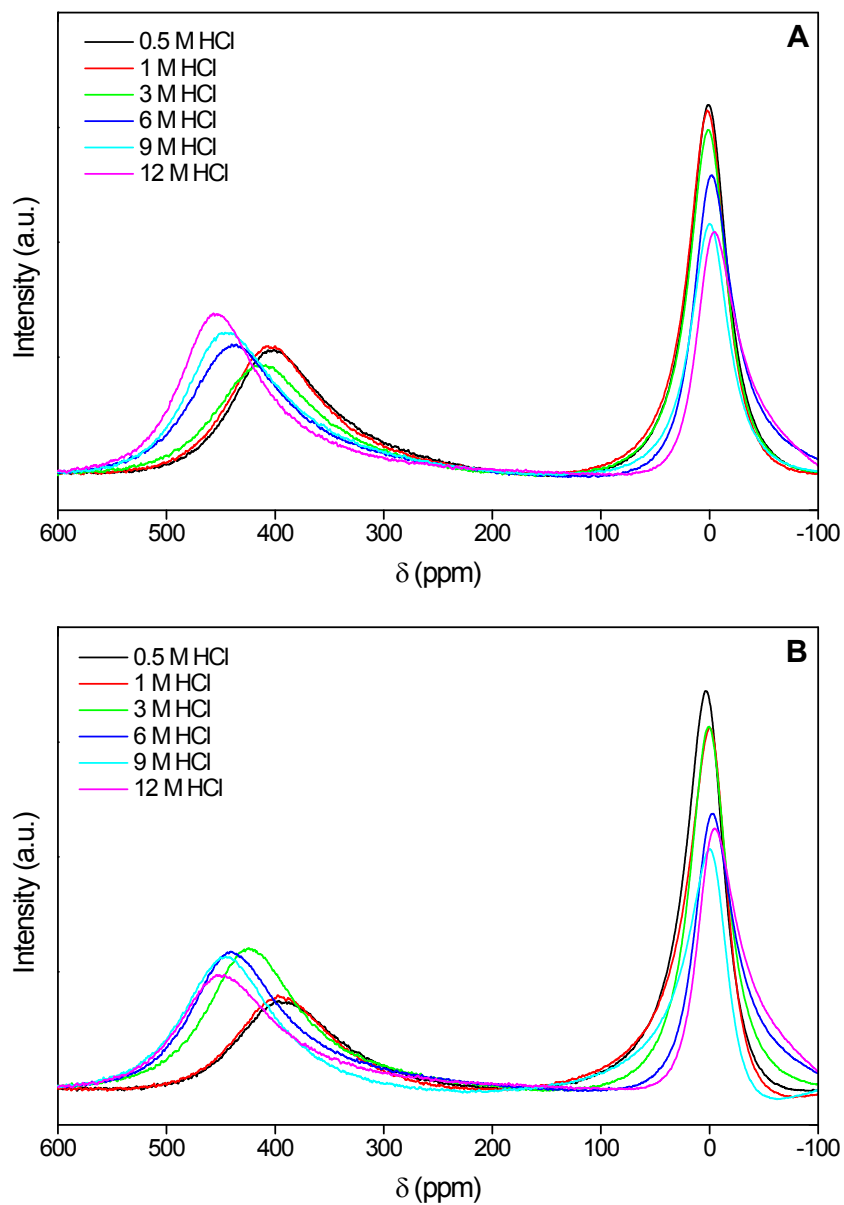

**Fig. S5**  $^{115}\text{In}$  NMR spectra of the  $\text{InCl}_3$ -Cyphos® IL 101 (A) and  $\text{InCl}_3$ -Aliquat® 336 system (B) at 60 °C obtained after extraction with 5 g L<sup>-1</sup> indium(III) and varying HCl concentration: 0.5 M (—), 1 M (—), 3 M (—), 6 M (—), 9 M (—) and 12 M (—).

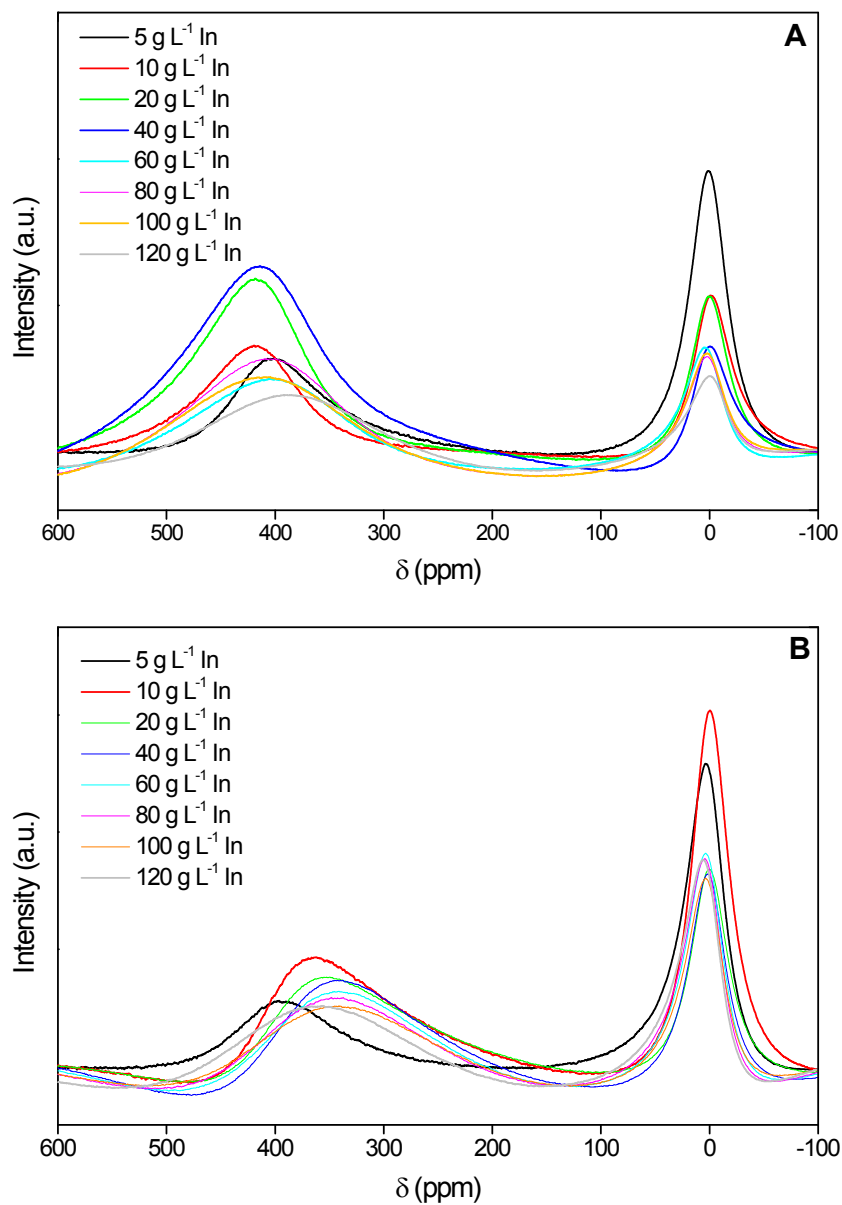

**Fig. S6**  $^{115}\text{In}$  NMR spectra of the  $\text{InCl}_3$ -Cyphos<sup>®</sup> IL 101 (A) and  $\text{InCl}_3$ -Aliquat<sup>®</sup> 336 system (B) at 60 °C obtained after extraction with 0.5 M HCl and varying indium(III) concentration: 5 g L<sup>-1</sup> (—), 10 g L<sup>-1</sup> (—), 20 g L<sup>-1</sup> (—), 40 g L<sup>-1</sup> (—), 60 g L<sup>-1</sup> (—), 80 g L<sup>-1</sup> (—), 100 g L<sup>-1</sup> (—) and 120 g L<sup>-1</sup> (—).



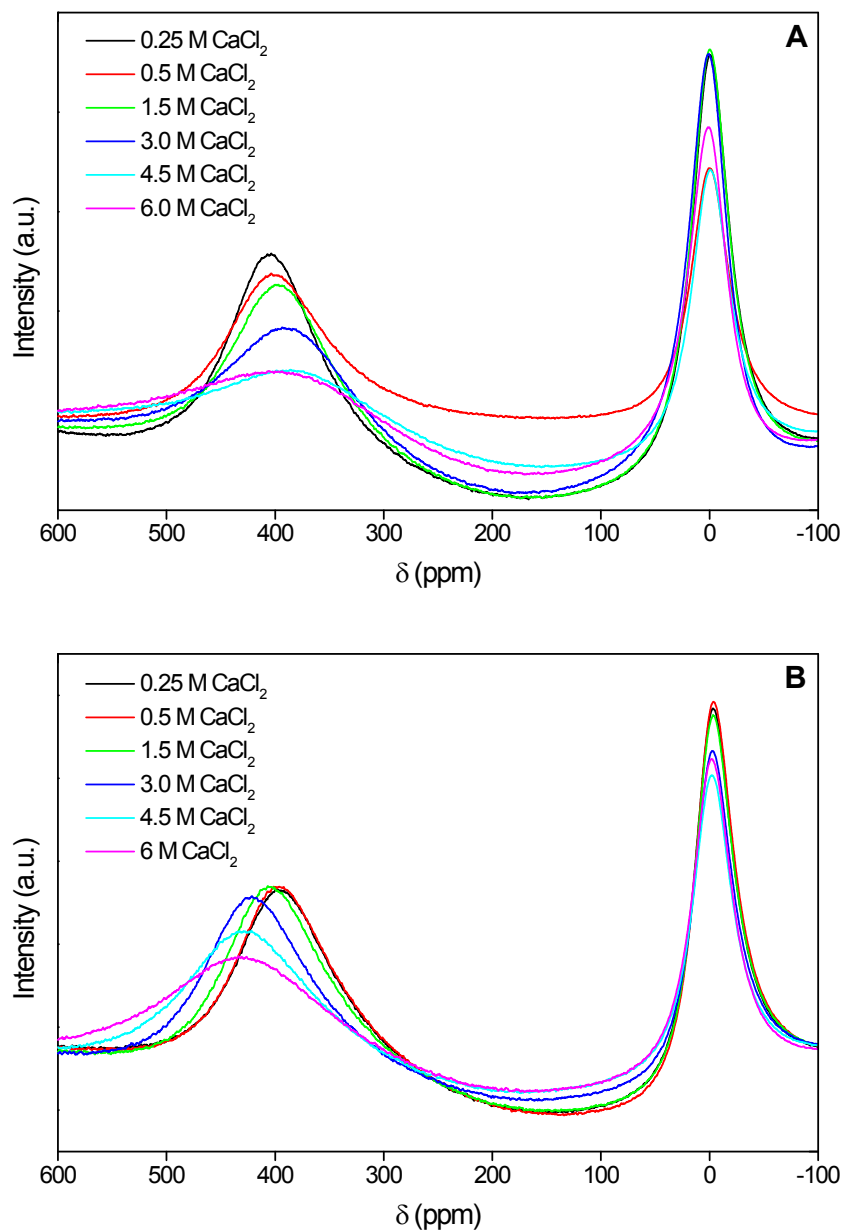

**Fig. S6**  $^{115}\text{In}$  NMR spectra of the  $\text{InCl}_3$ –Cyphos<sup>®</sup> IL 101 (A) and  $\text{InCl}_3$ –Aliquat<sup>®</sup> 336 system (B) at 60 °C obtained after extraction with 5 g L<sup>-1</sup> indium(III) and varying  $\text{CaCl}_2$  concentration: 0.25 M (—), 0.5 M (—), 1.5 M (—), 3 M (—), 4.5 M (—) and 6 M (—).
